# Supplementary material
Source: PubMed Central journal article supplement (PMC3525851)
Supplement: mmc1.pdf [file mmc1.pdf]

## **SUPPORTING MATERIAL**

For: “Detergent properties influence the stability of the Glycophorin A transmembrane helix in lysophosphatidylcholine micelles”

by M. Stangl et al.

## **CONTENTS**

|                          |   |
|--------------------------|---|
| SUPPORTING TABLE .....   | 2 |
| SUPPORTING FIGURES ..... | 4 |

## SUPPORTING TABLES

Table S1: Apparent GpA TM domain dissociation constants in lyso-PC micelles.

| lyso-PC    | $c$ mM | app $K_D$ | Excess detergent<br>(mol:mol) | Excess micelles<br>(mol:mol) |
|------------|--------|-----------|-------------------------------|------------------------------|
| <b>C10</b> | 10.69  | 0.003     | 21380                         | 232                          |
|            | 12.15  | 0.023     | 24300                         | 305                          |
|            | 13.12  | 0.072     | 26240                         | 353                          |
|            | 14.59  | 0.133     | 29180                         | 427                          |
|            | 17.01  | 0.207     | 34020                         | 548                          |
|            | 29.17  | 0.577     | 58340                         | 1156                         |
|            | 38.88  | 0.678     | 77760                         | 1641                         |
|            | 48.61  | 1.246     | 97220                         | 2128                         |
|            | 58.33  | 1.405     | 116660                        | 2614                         |
| <b>C11</b> | 4.70   | 0.029     | 9400                          | 86                           |
|            | 7.05   | 0.173     | 14100                         | 156                          |
|            | 10.34  | 0.373     | 20680                         | 255                          |
|            | 11.75  | 0.534     | 23500                         | 297                          |
|            | 14.10  | 0.706     | 28200                         | 367                          |
|            | 18.80  | 0.729     | 37600                         | 507                          |
|            | 23.50  | 0.863     | 47000                         | 647                          |
|            | 32.90  | 1.177     | 65800                         | 928                          |
|            | 42.30  | 1.292     | 84600                         | 1209                         |
|            | 61.10  | 1.705     | 122200                        | 1770                         |
| <b>C12</b> | 2.28   | 0.001     | 4560                          | 42                           |
|            | 3.41   | 0.054     | 6820                          | 69                           |
|            | 4.56   | 0.101     | 9120                          | 97                           |
|            | 6.83   | 0.330     | 13660                         | 153                          |
|            | 9.12   | 0.459     | 18240                         | 209                          |
|            | 11.38  | 0.658     | 22760                         | 264                          |
|            | 15.93  | 0.925     | 31860                         | 375                          |
|            | 22.75  | 1.486     | 45500                         | 541                          |
|            | 34.13  | 2.449     | 68260                         | 819                          |
|            | 56.88  | 2.735     | 113760                        | 1373                         |
| <b>C13</b> | 1.41   | 0.003     | 2820                          | 26                           |
|            | 2.12   | 0.139     | 4240                          | 40                           |
|            | 4.41   | 0.202     | 8820                          | 87                           |
|            | 6.60   | 0.340     | 13200                         | 132                          |
|            | 11.00  | 0.774     | 22000                         | 221                          |
|            | 17.60  | 1.398     | 35200                         | 356                          |
|            | 26.50  | 2.146     | 53000                         | 538                          |

|            |       |        |        |      |
|------------|-------|--------|--------|------|
|            | 44.10 | 2.656  | 88200  | 897  |
|            | 61.70 | 2.193  | 123400 | 1256 |
| <b>C14</b> | 0.64  | 0.001  | 1280   | 10   |
|            | 0.86  | 0.090  | 1720   | 13   |
|            | 1.07  | 0.214  | 2140   | 16   |
|            | 2.14  | 0.638  | 4280   | 33   |
|            | 4.28  | 1.563  | 8560   | 67   |
|            | 6.42  | 3.141  | 12840  | 101  |
|            | 8.55  | 3.461  | 17100  | 135  |
|            | 10.70 | 4.222  | 21400  | 169  |
|            | 21.40 | 3.003  | 42800  | 339  |
|            | 34.22 | 2.642  | 68440  | 543  |
|            | 59.88 | 2.698  | 119760 | 950  |
| <b>C15</b> | 0.62  | 0.011  | 1240   | 7    |
|            | 0.93  | 0.225  | 1860   | 10   |
|            | 1.25  | 0.700  | 2500   | 14   |
|            | 2.18  | 1.776  | 4360   | 24   |
|            | 3.11  | 4.524  | 6220   | 34   |
|            | 6.23  | 6.158  | 12460  | 68   |
|            | 9.34  | 6.840  | 18680  | 102  |
|            | 18.70 | 11.544 | 37400  | 204  |
|            | 31.20 | 11.391 | 62400  | 341  |
|            | 62.30 | 17.513 | 124600 | 681  |
| <b>C16</b> | 0.49  | 0.056  | 980    | 5    |
|            | 0.77  | 0.274  | 1540   | 7    |
|            | 3.03  | 2.974  | 6060   | 29   |
|            | 6.05  | 12.935 | 12100  | 58   |
|            | 12.10 | 23.281 | 24200  | 116  |
|            | 24.21 | 27.712 | 48420  | 232  |
|            | 36.32 | 37.716 | 72640  | 348  |
|            | 60.53 | 11.609 | 121060 | 579  |

## SUPPORTING FIGURES

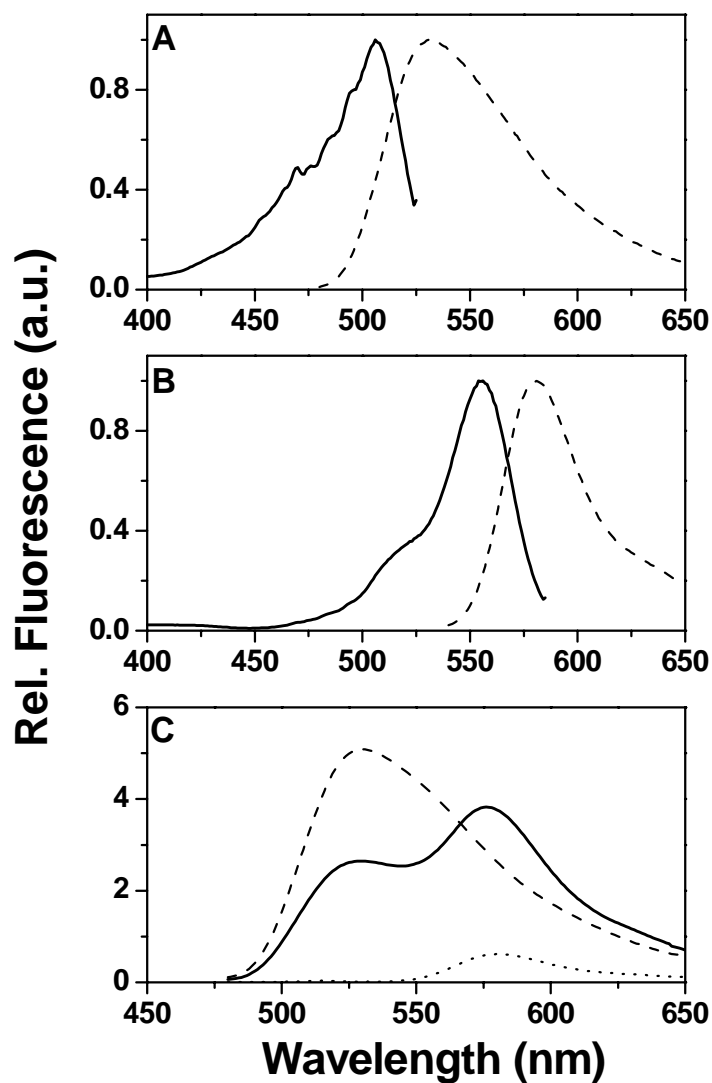

Fig. S1. Excitation (solid lines) and emission spectra (dashed lines) of FI (donor)- and TAMRA (acceptor)-labeled GpA peptides. (A) FI-GpA, excitation  $\lambda = 439$  nm, emission  $\lambda = 530$  nm. (B) TAMRA-GpA, excitation  $\lambda = 530$  nm, emission  $\lambda = 590$  nm. (C) Fluorescence emission spectra of donor- and acceptor-labeled peptides (solid lines) as well as control samples containing only donor-labeled peptides (dashed lines) and only acceptor-labeled peptides (dotted lines) after excitation at 439 nm. The arrow indicates sensitized fluorescence emission of the acceptor fluorophore after donor excitation. Spectra were measured in 10 mM HEPES buffer containing 150 mM NaCl and 5 mM C12 lyso-PC at pH 7.4.

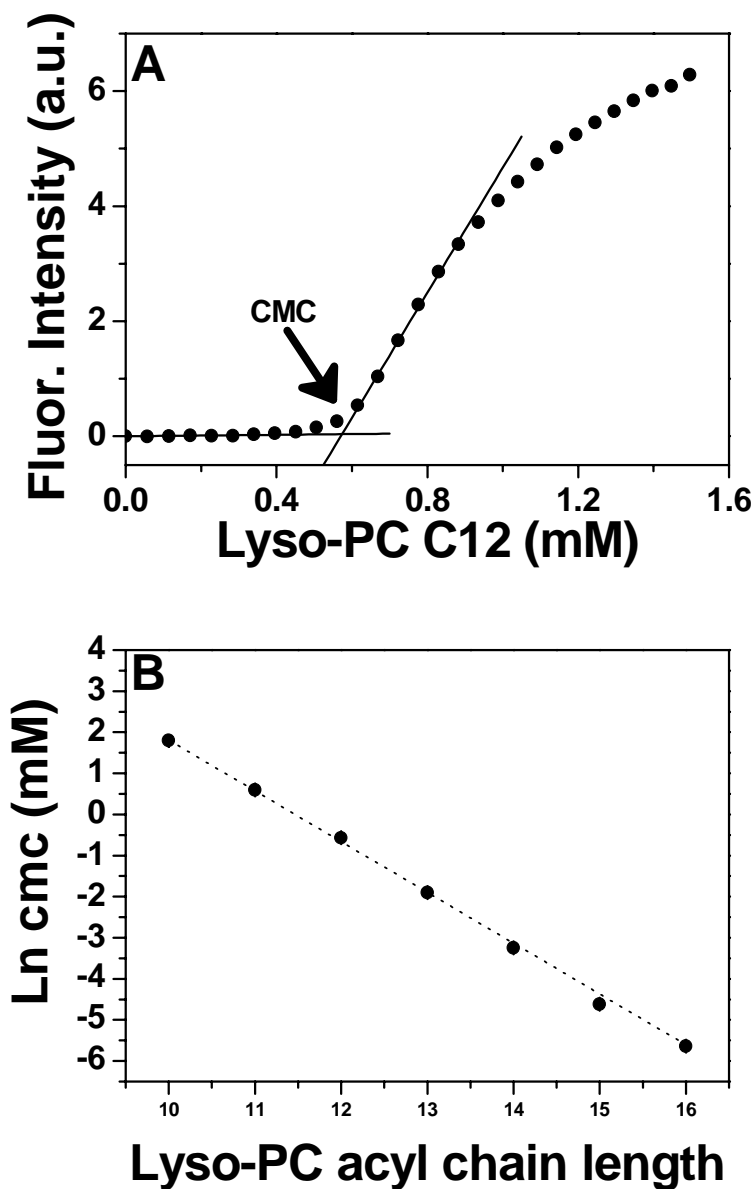

Fig. S2: Critical micellar concentration of lyso-PCs.

(A) Determination of lyso-PC *cmc*'s by fluorescence spectroscopy. Fluorescence intensity of ANS at 490 is plotted as a function of C12 lyso-PC concentration. For each plot, the C12 lyso-PC concentration corresponding to the first break in the slope was taken as the CMC.

(B) Chain-length dependency of the *cmc*'s. The *cmc* of each lyso-PC was determined as described in (A).

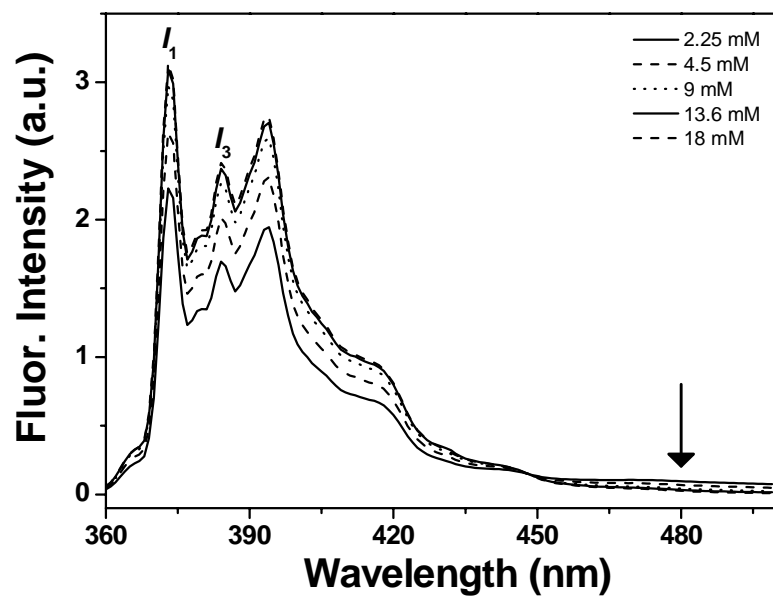

Fig. S3: Representative fluorescence spectra of 2  $\mu$ M pyrene in an aqueous solution of C12 lyso-PC at various concentrations.  $I_1$  and  $I_3$  are the intensity of the first and the third vibronic peaks in the pyrene emission spectra. The arrow at 480 nm indicates absence of an eximer peak at various tested C12 lyso-PC concentrations.
